# Supplementary material for: Blue cheese-making has shaped the population genetic structure of the mould Penicillium roqueforti
Source: PLoS One. 2017 Mar 1;12(3):e0171387. doi: 10.1371/journal.pone.0171387 (PMC5331954; doi:10.1371/journal.pone.0171387)
Supplement: S1 Table — (XLSX) [file pone.0171387.s001.xlsx]

## Sheet: Feuil1
Table S1: Strain ID and information: environment of collection and assignment to the 8 clusters
Walla	CheesyTer	Substrate	Country	K=8	Details	K=8 DAPC	Strain ID
W-	C-	Unknown	Unknown	4		1	LCP02492
W-	C-	Roquefort	France	4	Type. Isolated in the USA from French cheese	1	LCP04157
W-	C-	Roquefort	France	4	Aveyron. Monoprix gourmet. Sheep's milk	1	LCP06128
W-	C-	Gorgonzola	Italy	4	Produced in Milan. Cow's milk	1	LCP06130
W-	C-	Great Hill Blue cheese	USA	8	Produced by Great Hill Dairy. Shores of Buzzard's Bay, Marion, Massachusetts. Raw cow's milk	1	LCP06136
W-	C-	Roquefort	France	4	Monoprix Gourmet. Sheep's milk	1	LCP06142
W-	C-	Black river Blue	USA	8	North Hendren Cheese Cooperative, Wisconsin. Cow's milk	1	LCP06144
W-	C-	Dunbarton Cheddar Blue	USA	8	Roelli Cheese Haus, Wisconsin. Cow's milk	1	LCP06145
W-	C-	Roquefort	France	4	Produced by Societé. Sheep's milk	1	LCP06152
W-	C-	Roquefort	France	8	Roquefort 14 mois d'affinage. Sold by Androuet. Sheep's	1	LCP06156
W-	C-	Roquefort	France	8	Sold by Auchan. Sheep's milk	1	LCP06158
W-	C-	Beauvale	UK	8	Made by Cropwell Bishop in the Vale of Belvoir south east of Nottingham. Cow's milk	1	LCP06161
W-	C-	Roquefort	France	8	Produced by Papillon in natural caves, Sold by Monoprix	1	LCP06163
W-	C-	Roquefort Cosse noir	France	4	Produced by Gabriel Coulet cheese industry. Sheep's milk	1	LCP06164
W+	C+	Chevre In Blue (Montchevre)	USA	8	Wisconsin and Iowa. Goat's milk	1	LCP06167
W-	C-	St.Pete's	USA	8	Produced by Faribault Dairy Company, Straight River, Minnesota. Raw cow's milk	1	LCP06175
W-	C-	Great Hill Blue	USA	8	Produced by Shores of Buzzard's Bay, 50 miles south of Boston, Great Hill Dairy in Marion, Massachusetts. Cow's milk	1	LCP06177
W-	C-	Moody Blue	USA	8	Produced by Roth Kase. Wisconsin. Cow's milk	1	LCP06179
W+	C+	Moody Blue	USA	8	Produced by Roth Kase. Wisconsin. Cow's milk	1	LCP06180
W-	C-	Moody Blue	USA	8	Produced by Roth Kase. Wisconsin. Cow's milk	1	LCP06190
W-	C-	Roquefort	France	4	Aveyron, sold by Monoprix. Sheep's milk	1	LCP06191
W-	C-	Roquefort	France	4	Aveyron, produced by Papillon, sold by Monoprix. Sheep's milk	1	LCP06193
W-	C-	Roquefort	France	4	Aveyron, produced by La Pastourelle sold by Daguerre. Sheep's milk	1	LCP06198
W-	C-	Roquefort	France	8	Aveyron, produced by Carles. Sold by Androuet. Sheep's milk	1	LCP06199
W-	C-	Huntsman	UK	8	Double Gloucester and Blue Stilton. Cow's milk	1	LCP06218
W-	C-	Dunbarton Cheddar Blue	USA	8	Salisbury, Missouri. Cow's milk	1	LCP06228
W-	C-	Gorgonzola	Italy	8	Lombardy. Cow's milk	1	LCP06230
W-	C-	Point Reyes Original Blue	USA	8	Tomales Bay, California. Unpasteurized cow's milk	1	LCP06237
W-	C-	Regina Blue	Germany	8	Bavaria. Cow's milk	1	LCP06239
W-	C-	Roquefort Vernieres	France	8	Rouergue, aged naturally in the caves of Cambalou. Unpasteurized sheep's milk	1	LCP06241
W-	C-	Barkham Blue	UK	8	Produced by Two Hoots Cheese Farmhouse Cheese. Reading. Cow's milk	1	LCP06255
W-	C-	Colston Bassett Shropshire Blue	UK	8	Produced by Colston Bassett Dairy. Shropshire. Cow's milk	1	LCP06257
W-	C-	Blue Benedict	Canada	8	Quebec, Abbey de Saint-Benoit-du-lac. Cow's milk	1	LCP06268
W-	C-	Blue Ermite	Canada	8	Quebec, Abbey de Saint-Benoit-du-lac. Cow's milk	1	LCP06270
W-	C-	Stilton	UK	8	Cow's milk	1	LCP06272
W-	C-	Hook's Little Boy Blue Cheese	USA	8	Southwest Wisconsin. Raw sheep's milk	1	LCP06280
W-	C-	Montforte Gorgonzola	USA	8	Wisconsin. Cow's milk	1	LCP06282
W+	C+	Black River Gorgonzola	USA	8	North Hendren Co-op Dairy, located about two miles north of Willard, Wisconsin. Cow's milk	1	LCP06287
?	?	Sartori Dolcina Gorgonzola	USA	8	Wisconsin. Cow's milk	1	LCP06290
W+	C+	Hook's Original Blue	USA	8	Southwest Wisconsin. Cow 's milk	1	LCP06291
W-	C-	Montforte Blue	USA	8	Wisconsin. Cow's milk	1	LCP06292
?	?	Point Reyes Original Blue	USA	8	Point Reyes, Northern California. Cow's milk	1	LCP06296
W-	C-	Roquefort	France	4	Aveyron. Sheep's milk	1	LCP06298
W-	C-	Pastor picon	Spain	4	Cow's milk	1	LCP06304
W-	C-	Roquefort	France	8	Sheep's milk	1	LCP06310
W-	C-	Formaggio erborinato	Italy	8	Sardinia	1	LCP06311
W+	C+	Silver brook blue	USA	8	Vermont. Raw sheep's milk	1	LCP06314
W+	C+	Aura blue cheese	Finland	8	Valio. Cow's milk	1	LCP06325
W+	C+	Kvibille Ädel	Sweden	8	Kvibille dairy in the south-west of the contry.	1	LCP06326
W-	C-	Blue cheese	Sweden	8	Produced by Lillangen mejeri. Goat's milk	1	LCP06330
W-	C-	Point Reyes Original Blue	USA	8	Point Reyes, California. Cow's milk	1	LCP06332
W-	C-	Barden blue	USA	8	Consider Bardwell Farm. Raw cow's milk	1	LCP06334
W-	C-	Bredsjö Blå	Sweden	8	Bredsjö Mjölkfår. Sheep's milk	1	LCP06340
W-	C-	Roquefort	France	4	Aveyron, produced by Carles. Sold by Androuet. Sheep's milk	1	LCP06350
?	?	Rye bread in cheese company	France	4		1	LCP06467
?	?	Manure	France	4		1	LCP06468
?	?	Silage	France	8		1	LCP06470
?	?	Flask cave of Roquefort	France	4		1	LCP06473
?	?	Silage	France	8		1	LCP06474
?	?	Silage	France	8		1	LCP06476
?	?	Rye bread in cheese company	France	4		1	LCP06477
W+	C+	Crémeux du Puy	France	3	Sold by Androuet. Cow's milk	2	LCP06129
W+	C+	Cambozola Black label	Germany	3	Kasseri Champignon, Bavaria. Cow's milk	2	LCP06138
W+	C+	Cambozola Black Label	Germany	3	Kasseri Champignon, Bavaria. Cow's milk	2	LCP06143
W+	C+	Montbriac	France	3	Haute-Loire, Sold by Daguerre. Cow's milk	2	LCP06153
W-	C-	Fourme d'Ambert	France	3	Sold by Androuet. Cow's milk	2	LCP06157
W+	C+	Blu del Moncenisio	Italy	3	Produced in the province of Turin, in the area of the Moncenisio Pass in Val di Susa, near the French border of Italy. Cow's milk	2	LCP06165
W+	C+	Crémeux du Puy	France	3	Produced by Fromage rouge, sold by Monoprix. cow, goat, and sheep's milk depending on availability	2	LCP06170
W+	C+	Chiriboga Blue	Germany	3	Allgau. Cow's milk	2	LCP06184
W+	C+	Rochebaron	France	3	Haute-Loire. Sold by Monoprix. Cow's milk	2	LCP06197
W+	C+	Bleu de Gobet	France	3	Produced by La fruitiere	2	LCP06202
W+	C+	Blue stilton	UK	3	Colston Bassett Dairy of Nottinghamshire. Cow's milk	2	LCP06222
W+	C+	Blue Gouda	USA	3	Goat's milk	2	LCP06233
W+	C+	ReginaBlue	Germany	3	Bavaria. Cow's milk	2	LCP06240
W+	C+	Cheese	France	3	Cheese produced by Entremont	2	LCP06248
W+	C+	Dutch organic blue	Netherlands	3	Wageningen. Cow's milk	2	LCP06276
W+	C+	Rochebaron	France	3	Beauzac in the Auvergne region. Cow's milk	2	LCP06277
W+	C+	White Lemon Zest Stilton	USA	3		2	LCP06283
W+	C+	Regina Blu	Germany	3	Bavaria. Cow's milk	2	LCP06286
W+	C+	Azul Peña Santa	Spain	3	Asturias. Cow and sheep's milk	2	LCP06307
W+	C+	Formaggio erborinato	Italy	3	Sardinia	2	LCP06312
W-	C-	Sörmlands Ädel	Sweden	3	Cow's milk	2	LCP06327
W+	C+	Roquefort	France	1		3	LCP00146
W+	C+	Blue	France	1		3	LCP06097
W+	C+	Stilton	UK	1	Cow's milk	3	LCP06132
W+	C+	Blue Sunshine	USA	1	Produced by Winter Park Dairy from French cultures. Florida. Raw cow's milk	3	LCP06134
W+	C+	Bath Blue	UK	1	Bath Soft Cheese company in Kelston near Bath, Somerset. Cow's milk	3	LCP06135
W+	C+	Bleu du Bocage	France	1	Pays de la Loire. Goat's milk	3	LCP06146
W+	C+	Cavemaster reserve barden blue	USA	1	Consider Bardwell, Vermont. Unpasteurized cow's milk	3	LCP06148
W+	C+	Stilton AOP	UK	1	Sold by Monoprix. Cow's milk	3	LCP06149
W+	C+	Bleu des Basques	France	1	Pyrénées Atlantique, sold by Monoprix. Sheep's milk	3	LCP06151
W+	C+	Bleu d'Auvergne	France	1	Sold by Androuet. Cow's milk	3	LCP06154
W+	C+	Shropshire	UK	1	Nottinghamshire, Shropshire. Nottinghamshire, Shropshire	3	LCP06155
W+	C+	Oregonzola	USA	1	Produced by Rogue Creamery, Rogue River Valley, southwestern Oregon. Sustainable Raw Cow’s Milk	3	LCP06171
W+	C+	Middlebury blue	USA	1	Blue Ledge Farm, Salisbury, Vermont. unpasteurized cow's milk	3	LCP06172
W+	C+	Blue	USA	1	Produced by Maytag Dairy, Rolling hills of central Iowa. Unpasteurized cow's milk	3	LCP06174
W+	C+	Cambozola	Germany	1	Produced by Kasseri Champignon, Bavaria. Cow's milk	3	LCP06176
W+	C+	Blue Gouda	USA	1	Goat's milk	3	LCP06178
W+	C+	Shropshire Blue	UK	1	Leicestershire. Cow's milk	3	LCP06182
W+	C+	Bayley Hazen Blue	USA	1	Cellars at Jasper Hill, Vermont. Unpasteurized cow's milk	3	LCP06183
W+	C+	Blu di Bufala	Italy	1	Lombardy region. Water buffalo's milk	3	LCP06185
W+	C+	Tuxford & Tebbutt Stilton	UK	1	Leicestershire. Cow's milk	3	LCP06186
W+	C+	Caveman Blue	USA	1	Rogue Creamery, Oregon. Unpasteurized cow's milk	3	LCP06187
W+	C+	Valdeon	Spain	1	Castilla y León. Pasteurized goat and cow's milk	3	LCP06188
W+	C+	Moody Blue	USA	1	Produced by Roth Kase. Wisconsin. Cow's milk	3	LCP06189
W+	C+	Fourme d'Ambert	France	1	Sold by Monoprix. Cow's milk	3	LCP06192
W+	C+	Saint Agur	France	1	Sold by Monoprix. Cow's milk	3	LCP06194
W+	C+	Picos de Europa	Spain	1	Castilla y León	3	LCP06203
W+	C+	Cotswold Blue Brie	UK	1	Made by Simon Weaver at Cotswold Organic Dairy in Upper Slaughter, Gloucestershire. Cow's milk	3	LCP06204
W+	C+	Stilton	UK	1	Monoprix Gourmet. Cow's milk	3	LCP06205
W+	C+	Oxford Blue	UK	1	Made by Baron Pouget of the Oxford Cheese Company in Worminghall, Buckinghamshire. Cow's milk	3	LCP06206
W+	C+	Perl Las Blue	UK	1	Made by Caws Cenarth at Glyneithinog Farm in West Wales. Organic cow's milk	3	LCP06207
W+	C+	Stilton	UK	1	Made by Cropwell Bishop in the Vale of Belvoir south east of Nottingham. Cow's milk	3	LCP06209
W+	C+	Cashel Blue	Ireland	1	Beechmount Farm, the rolling hills of Tipperary in Ireland. Cow's milk	3	LCP06210
W+	C+	Bleu Sunshine	USA	1	Produced by by Winter Park Dairy. Florida, from imported French cultures. Unpasteurized cow's milk	3	LCP06211
W+	C+	Butlers Blacksticks Blue	UK	1	Butlers Farmhouse Cheeses, Lancashire. Cow's milk	3	LCP06212
W+	C+	Asher Blue	USA	1	Sweet Grass Dairy, Thomasville, Georgia. Unpasteurized cow's milk	3	LCP06213
W+	C+	Windsor Blue	New Zeland	1	Central South Island. Cow's milk	3	LCP06214
W+	C+	Buttermilk Bleu	USA	1	Affinee by Roth Kase, Monroe, Wisconsin. Unpasteurized cow's milk	3	LCP06215
W+	C+	Caveman Blue	USA	1	Rogue Creamery, Rogue River Valley, southwestern Oregon. Unpasteurized cow's milk	3	LCP06216
W+	C+	Middlebury blue	USA	1	Blue Ledge Farm, Salisbury, Vermont. Unpasteurized cow's milk	3	LCP06217
W+	C+	Blue stilton	UK	1	Cropwell Bishop, Nottingham, Nottinghamshire. Cow's milk	3	LCP06224
W+	C+	Black Castello	Denmark	1	Produced in Denmark, with special ripening cultures from Southern Europe. Pasteurized sheep and cow's milk	3	LCP06227
W+	C+	Danish Crumbly Blue	Denmark	1	Produced in the Island of Bornholm, in the east of Denmark, close to Sweden and Poland. Cow's milk	3	LCP06229
W+	C+	Hamlet Danish Blue, Danablu	Denmark	1	Svendborg on the island of Funen. Cow's milk	3	LCP06232
W+	C+	Gorgonzola Picante	Italy	1	Near Milan. Cow's milk	3	LCP06234
W+	C+	Borgonzola	Canada	1	Inoculated with Italian Gorgonzola mold that the Borgo family imports from a town outside of Milan. Cow's milk	3	LCP06235
W+	C+	Mountain Gorgonzola	Italy	1	Lombardy region. Mold coming from the local caves of Valsassina. Cow's milk	3	LCP06236
W+	C+	Shropshire Blue	UK	1	Leicestershire. Cow's milk	3	LCP06242
W+	C+	Royal Blue Stilton	UK	1	Produced by Long Clawson, Vale of Belvoir, Leicestershire. Cow's milk	3	LCP06243
W+	C+	Rogue River Blue	USA	1	Rogue Creamery, Rogue River Valley, southwestern Oregon. Unpasteurized cow's milk	3	LCP06244
W+	C+	Cabrales	Spain	1	Asturias. Cow and goat's milk	3	LCP06245
W+	C+	Siero	Spain	1	Asturias. Cow's milk	3	LCP06247
W+	C+	Camonedo	Spain	1	Asturias. Cow and goat's milk	3	LCP06251
W+	C+	Cashel Blue	Ireland	1	Produced by Cashel Farmhouse Cheesemakers. Beechmount Farm. Tipperary. Cow's milk	3	LCP06252
W+	C+	Crozire Blue	Ireland	1	Produced by Cashel Farmhouse Cheesemakers. Beechmount Farm. Tipperary. Cow's milk	3	LCP06253
W+	C+	Colston Bassett Shropshire Blue	UK	1	Produced by Colston Bassett Dairy. Shropshire. Cow's milk	3	LCP06256
W+	C+	Blacksticks Blue	UK	1	Produced by Butlers Farmhouse Cheeses. Lancashire. Cow's milk	3	LCP06259
W+	C+	Lanark Blue	UK	1	Produced by Humprey Errington. Lanarkshire, Scotland. Sheep's milk	3	LCP06260
W+	C+	Beenleigh Blue	UK	1	Produced by Ticklemore Cheese Company. Devon. Sheep's milk	3	LCP06261
W+	C+	Devon Blue	UK	1	Produced by Ticklemore Cheese Company. Devon. Cow's milk	3	LCP06262
W+	C+	Danish Castello	Danemark	1	Cow's milk	3	LCP06263
W+	C+	Danish Castello	Danemark	1	Cow's milk	3	LCP06264
W+	C+	Tiger Blue	Canada	1	East of Vancouver in British Columbia’s Okanagan Valley. Cow's milk	3	LCP06267
W+	C+	Point Reyes Blue	USA	1	Point Reyes, California. Cow's milk	3	LCP06269
W+	C+	Blue Ermite	Canada	1	Quebec, Abbey de Saint-Benoit-du-lac. Cow's milk	3	LCP06271
W+	C+	Blamogel	Sweden	1	Brostorps Gård. Cow's milk	3	LCP06274
W+	C+	Black River Blue Cheese	USA	1	North Hendren Co-op Dairy, located about two miles north of Willard, Wisconsin. Cow's milk	3	LCP06279
W+	C+	Danish style Blue Cheese	USA	1	Wisconsin. Cow's milk	3	LCP06281
W+	C+	Buttermilk Blue	USA	1	Wisconsin. Raw cow's milk	3	LCP06285
W+	C+	Black River Gorgonzola	USA	1	North Hendren Co-op Dairy, located about two miles north of Willard, Wisconsin. Cow's milk	3	LCP06288
W+	C+	Sartori Dolcina Gorgonzola	USA	1	Wisconsin. Cow's milk	3	LCP06289
W+	C+	Bavarian Blue Brie	Germany	1	Bavaria. Cow's milk	3	LCP06293
?	?	Gorgonzola Piccante PDO	Italy	1	Lombardy. Cow's milk	3	LCP06294
W+	C+	Rogue River Blue	USA	1	Rogue Creamery, Rogue River Valley, southwestern Oregon. Unpasteurized cow's milk	3	LCP06295
W+	C+	Stilton	UK	1	Cow's milk	3	LCP06300
W+	C+	Bleu d'Auvergne	France	1	Cow's milk	3	LCP06301
W+	C+	Ziegengouda	Netherlands	1	Cow's milk	3	LCP06302
W+	C+	Valdeon	Spain	1	León. Cow and goat's milk	3	LCP06303
W+	C+	La Peral	Spain	1	Illas, Asturias. Cow's milk	3	LCP06308
W+	C+	Middlebury blue	USA	1	Vermont. Cow's milk	3	LCP06313
W+	C+	Crater Lake Blue	USA	1	Rogue Creamery, Rogue River Valley, southwestern Oregon. Cow's milk	3	LCP06315
W+	C+	Shropshire Blue	UK	1	Cow's milk	3	LCP06317
W+	C+	Dunsyre blue	UK	1	Produced by H.J. Errington farms in Lanarkshire, Scotland. Unpasteurised milk of Ayrshire cows	3	LCP06318
W+	C+	Stilton	UK	1	Cow's milk	3	LCP06319
W+	C+	Aura blue cheese	Finland	3	Valio. Cow's milk	3	LCP06324
W+	C+	Sörmlands Ädel	Sweden	1	Cow's milk	3	LCP06328
W+	C+	Creamy blue	Denmark	1	Produced by Castello. Cow's milk	3	LCP06329
W+	C+	Caveman Blue	USA	1	Rogue Creamery, Rogue River Valley, southwestern Oregon. Cow's milk	3	LCP06333
W+	C+	Gorgonzola	Italy	1		3	LCP06335
W+	C+	Stilton	UK	1	Cow's milk	3	LCP06336
W+	C+	Skärvången Bymejeri	Sweden	1	Skärvången	3	LCP06337
W+	C+	Vera	Sweden	1	Produced by Oviken Ost. Southern ridge of the lake "Storsjö" near the city of Östersund. Unpasteurized sheep's milk	3	LCP06339
W+	C+	Magna	Sweden	1	Produced by Oviken Ost. Southern ridge of the lake "Storsjö" near the city of Östersund. Unpasteurized sheep's milk	3	LCP06341
W+	C+	Bergaden Edelpilz	Germany	1	Bavarian Alps. Cow's milk	3	LCP06343
W+	C+	Bleu le trappeur	Canada	1	Quebec. Produced by Saint-Damase	3	LCP06345
W+	C+	Grin bleu lait cru	Canada	1	Quebec, Saint Hubert.	3	LCP06347
W+	C+	Bleu de brebis	France	1	Camargue. Sheep's milk	3	LCP06352
W-	C-	Atmosphere brasserie	Unknown	7		4	LCP00148
W-	C-	Cheese	Unknown	6		4	LCP01883
W-	C-	Wood	France	7	Reims	4	LCP04111
W-	C-	Fridge wall	France	7	Paris	4	LCP05419
W-	C-	Wood seasoning in the open air, Quercus sp.	France	7	Talence, Bordeaux	4	LCP06037
W-	C-	Fruit Malus sylvestris	USSR	7		4	LCP06039
W-	C-	Wood in process of drying in the open air	France	7	Talence, Bordeaux	4	LCP06040
W-	C-	Silage	Belgium	7		4	LCP06043
W-	C-	Molded silage (grass)	Netherlands	7		4	LCP06059
W-	C-	Sulphite liquor	Canada	7		4	LCP06060
W-	C-	Silage	France	7		4	LCP06098
W-	C-	Fruit compote	France	6	Paris suburbs	5	LCP03676
W-	C-	Fruit compote	France	6	Ile de France	5	LCP03969
W-	C-	Strawberry sorbet	France	6		5	LCP04180
W-	C-	Cheddar cheese	Unknown	6		5	LCP05629
W-	C-	Roquefort cheese	France	6	Produced by Société Caves Baragnaudes. Aveyron. Sheep's milk	5	LCP06131
W-	C-	Roquefort	France	6	Aveyron. Produced by Société ceves Baragnaudes la Délicatesse. Sold by Monoprix. Sheep's milk	5	LCP06201
?	?	Flask cave of Roquefort	France	6		5	LCP06472
?	?	Roquefort	France	6	Produced by the Baragnode Society. Sheep's milk	5	LCP06475
W-	C-	Brioche bread	France	7	Vendée	6	LCP02939
W-	C-	Fruit compote	France	7	Mitry Mory	6	LCP03914
W-	C-	Inner fridge wall	France	7	Paris	6	LCP05420
W-	C-	Inner fridge wall	France	7	Paris	6	LCP05421
W-	C-	Silage	France	7		6	LCP05885
W-	C-	Corkwinebottle	Belgium	7	Haverlee	6	LCP06036
W+	C+	Unknown	Unknown	7		6	LCP06058
W-	C-	Mouldy baker's yeast	Denmark	7		6	LCP06064
W+	C+	Gorgonzola	France	2		7	LCP06094
W+	C+	Roche Montagne cheese	France	2	Puy de Dôme	7	LCP06133
W+	C+	Gorgonzola	Italy	2	Milan, sold by Monoprix. Cow's milk	7	LCP06147
W+	C+	Roche Montagne Puy-de-Dôme	France	2	Produced by Bellevaire. Cow's milk	7	LCP06159
W+	C+	Beauvale	UK	2	Made by Cropwell Bishop in the Vale of Belvoir south east of Nottingham. Cow's milk	7	LCP06160
W+	C+	Cabrales	Spain	2	Cow, goat, and sheep's milk depending on availability	7	LCP06168
W+	C+	Jersey Blue	Switzerland	2	Produced by Willi Schmid Lichtensteig, on the Eastern side of Switzerland. unpasteurized Jersey cow's milk	7	LCP06173
W+	C+	Bleu de Sassenage	France	2	Vercors, Isere. Sold by Androuet. Cow's milk	7	LCP06195
W+	C+	Gorgonzola dolce DOP	Italy	2	Lombardy. Cow's milk	7	LCP06208
W+	C+	Echo Mountain Blue	USA	2	Rogue Creamery, Rogue River Valley, southwestern Oregon. Unpasteurized cow and goat's milk	7	LCP06220
W+	C+	Flora Nelle	USA	2	Rogue Creamery, Rogue River Valley, southwestern Oregon. Unpasteurized cow's milk	7	LCP06225
W+	C+	Gorgonzola	Italy	2	Lombardy. Cow's milk	7	LCP06231
W+	C+	Picos Blue	Spain	2	Asturias. Cow and goat's milk	7	LCP06254
W+	C+	Buttermilk blue	USA	2	Wisconsin. Cow's milk	7	LCP06265
W+	C+	Bleu d'Elizabeth	Canada	2	Quebec. Cow's milk	7	LCP06266
W+	C+	Rassen Bleu	Canada	2	Quebec. Cow's milk	7	LCP06273
W+	C+	Blå Kornblomst Eko	Denmark	2	Cow's milk	7	LCP06275
W+	C+	BelGioioso CreamyGorg	USA	2	Made by made by BelGioioso. Wisconsin. Cow's milk	7	LCP06278
W+	C+	Gorgonzola	Italy	2	Lombardy. Cow's milk	7	LCP06297
W+	C+	Kornblume Blue	Denmark	2		7	LCP06299
?	?	Azul Peña Santa	Spain	2	Asturias. Cow and sheep's milk	7	LCP06306
W+	C+	Bay Blue	USA	8	Point Reyes, Northern California. Cow's milk	7	LCP06316
W+	C+	Paveras bla	Sweden	2	Paveras gardsmejeri. Cow's milk	7	LCP06338
W+	C+	Weichkäse	Germany	2	Cow's milk	7	LCP06342
W+	C+	Cambozola	Germany	2	Cow's milk	7	LCP06344
W+	C+	Le Ciel de Charlevoix	Canada	2	Produced by Maison Maurice Dufour. Quebec. Cow's milk	7	LCP06346
W+	C+	Bleubry	Canada	2	Produced by La Fromagerie Alexis de Portneuf. Quebec. Cow's milk	7	LCP06348
W+	C+	La roche noire	Canada	2	Produced by La Fromagerie Alexis de Portneuf. Quebec. Cow's milk	7	LCP06349
W+	C+	Bleu de Laqueuille	France	2	Laqueuille. Cow's milk	7	LCP06351
W-	C-	Cheese industry	France	5		8	LCP06096
W-	C-	Bleu d'Auvergne	France	5	Marie-Anne Cantin, sold by Mooprix. Cow's milk	8	LCP06150
W-	C-	Roquefort	France	5	Produced by Carles, sold by Monoprix. Sheep's milk	8	LCP06169
W-	C-	Roquefort	France	5	Aveyron. Sold by Androuet. Sheep's milk	8	LCP06200
?	?	Silage	France	5		8	LCP06469
?	?	Silage	France	5		8	LCP06471
